# Supplementary material for: Palmitate and Stearate are Increased in the Plasma in a 6-OHDA Model of Parkinson’s Disease
Source: Metabolites. 2019 Feb 13;9(2):31. doi: 10.3390/metabo9020031 (PMC6409985; doi:10.3390/metabo9020031)
Supplement: Supplementary file 1 [file metabolites-09-00031-s001.pdf]

## Supplementary material

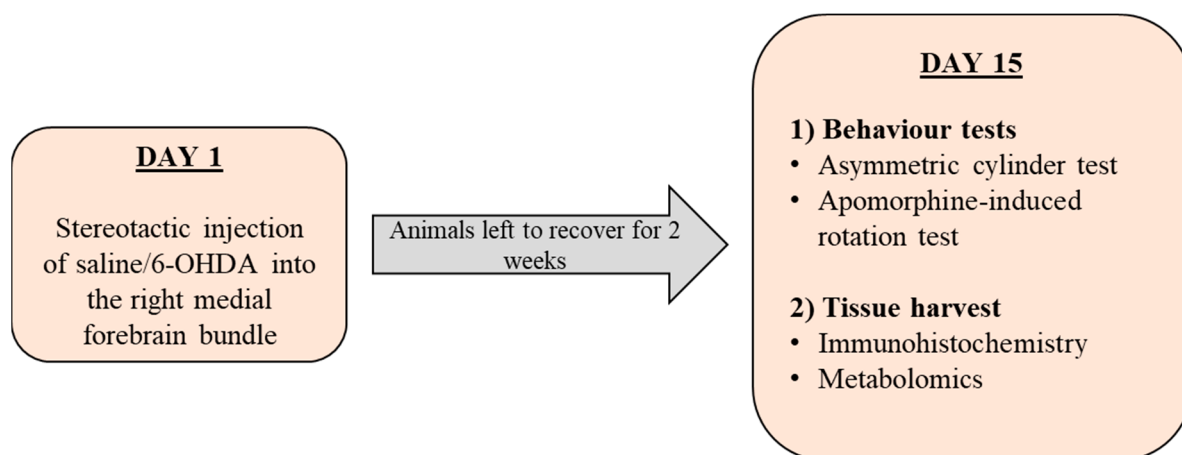

**Supplementary figure 1. Diagrammatic representation of the study design.**

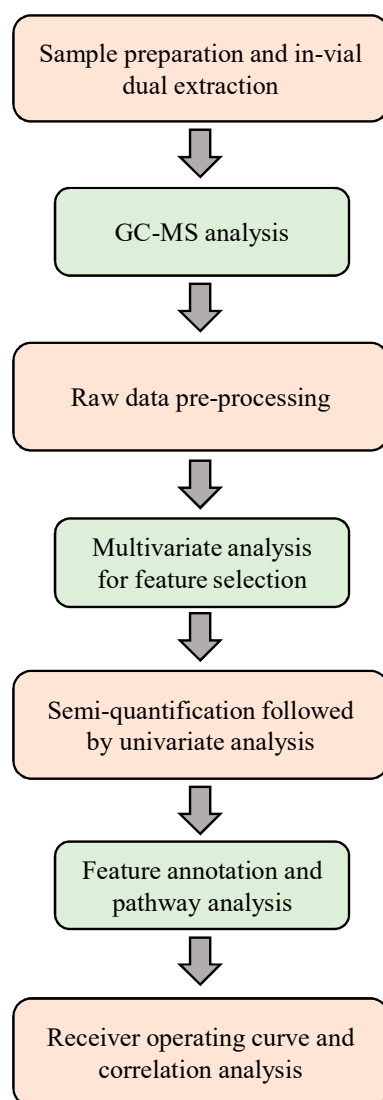

**Supplementary figure 2. Schematic of the metabolomics study design.** Workflow indicates the experimental design starting from sample preparation for GC-MS analysis, feature selection using multivariate and univariate analysis, and finally feature identification.

**A.**

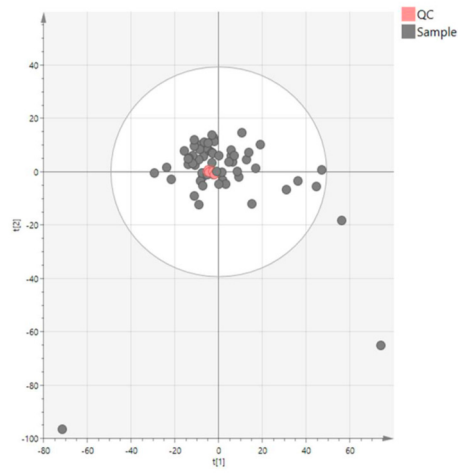

**B.**

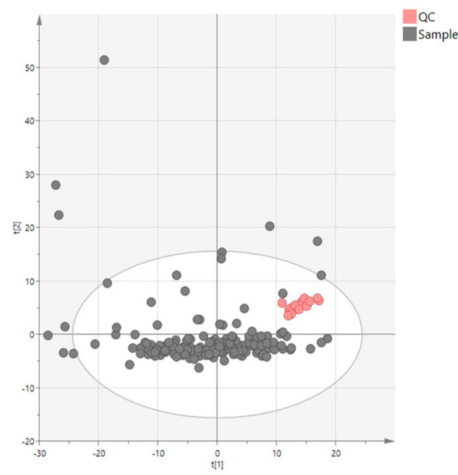

**Supplementary figure 3. PCA plots showing clustering of QC samples.** PCA plots for plasma (A) and mid-brain (B), illustrating a clear clustering of the QC samples.

**A.**

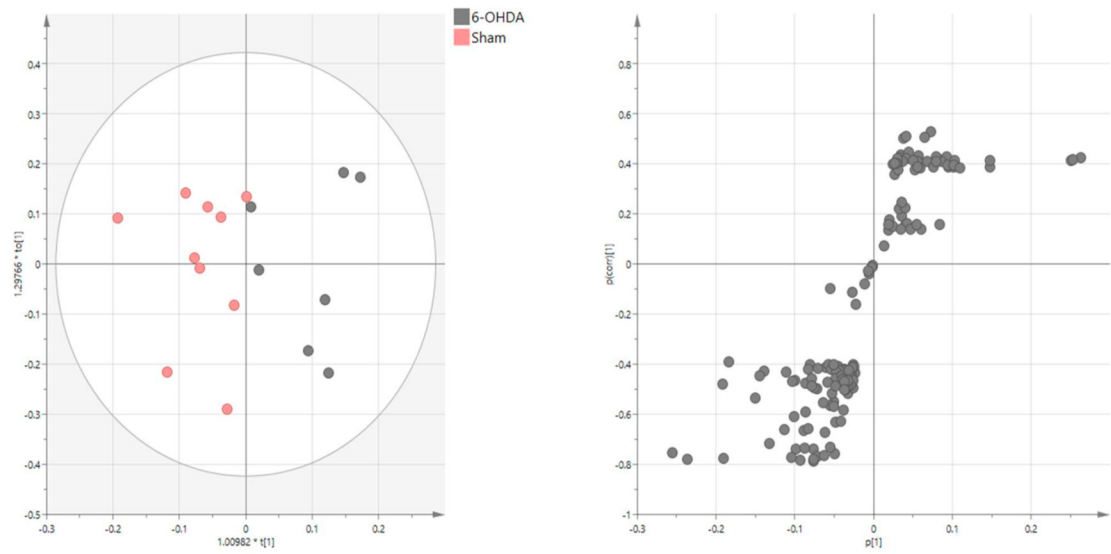

**B.**

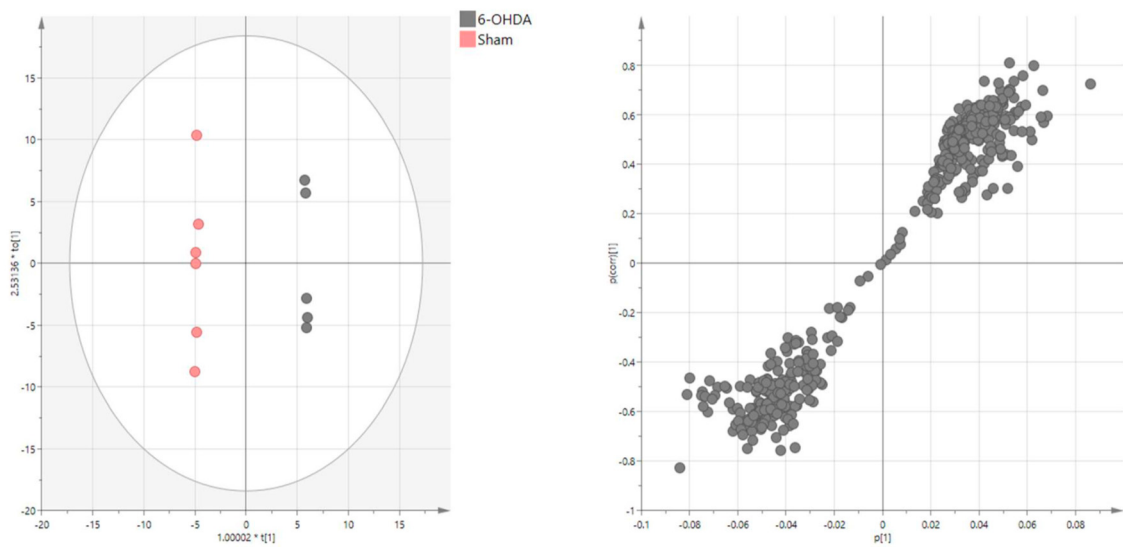

**Supplementary figure 4. OPLS-DA score plot and S-plot for plasma and mid-brain samples.**

OPLS-DA plots (left) showing a separation between the Sham and 6-OHDA groups in the plasma (A) and mid-brain (B), along with their corresponding S-plots (right) indicating thresholds for features selected.

A.

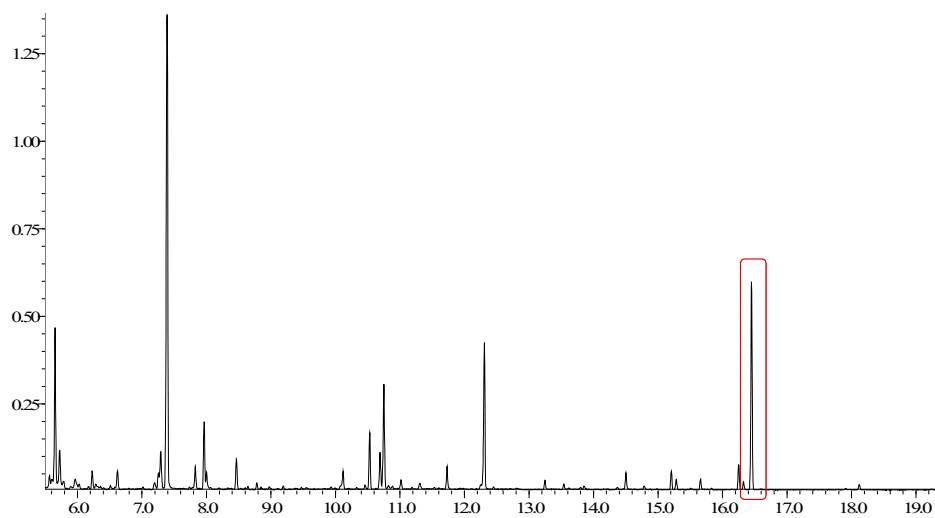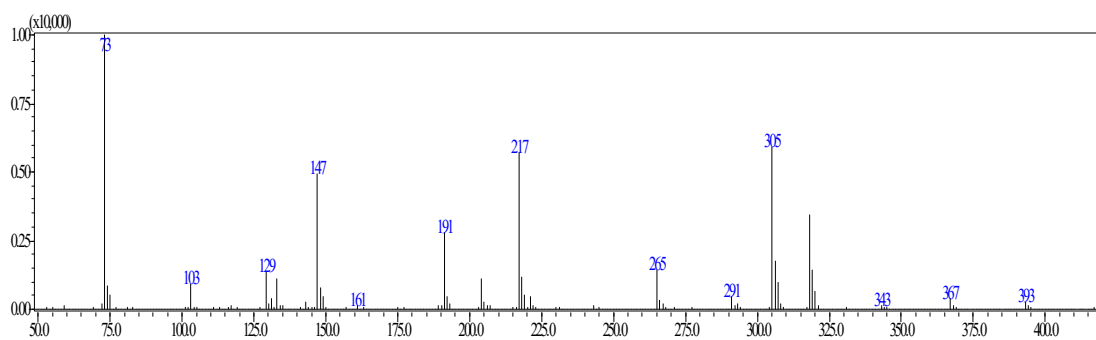

**B.**

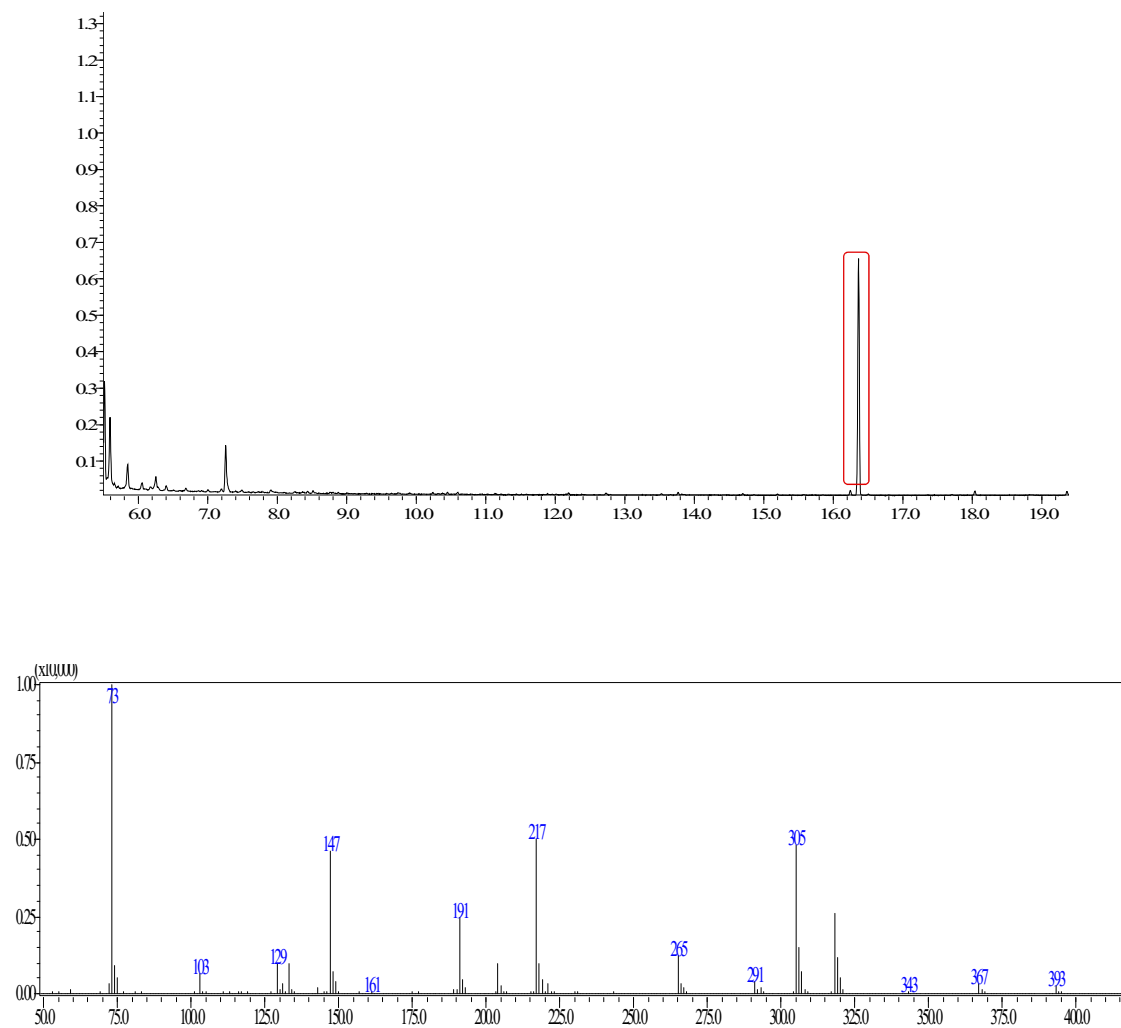

**Supplementary figure 5. Chromatograms and mass spectra of myo-inositol.** Highlighted myo-inositol peak (top figure) and its corresponding mass spectrum (bottom figure) from a midbrain sample (A) and the myo-inositol reference standard (B).

A.

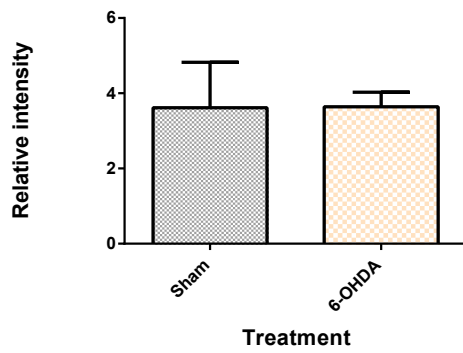

B.

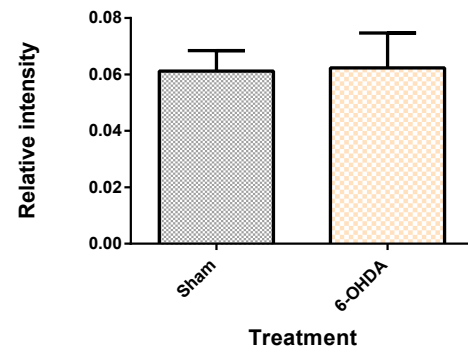

C.

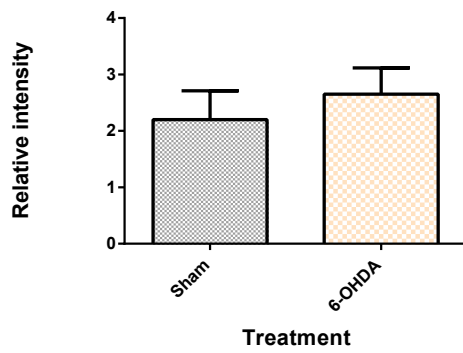

D.

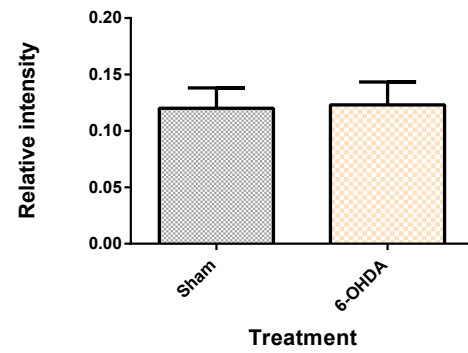

**Supplementary figure 6. Changes in liver metabolites.** Palmitic acid (A), monopalmitin (B), stearic acid (C) and monostearin (D) were all unchanged in the livers of the 6-OHDA vs sham groups. Data represent mean  $\pm$  S.D of at least 5 animals in each group.
